# Supplementary material
Source: PubMed Central journal article supplement (PMC11361381)
Supplement: NIHMS1930510-supplement-1.pdf [file NIHMS1930510-supplement-1.pdf]

## Supplemental material

### Technical details for bivariate linkage model

#### Maximum likelihood estimation

Combining (3) and (4), the distribution for  $(\hat{U}_m, \hat{V}_m)$  is given by

$$\begin{pmatrix} \hat{U}_m \\ \hat{V}_m \end{pmatrix} \sim MVN_2 \left( \begin{pmatrix} \mu_U \\ \mu_V \end{pmatrix}, \begin{pmatrix} \Sigma_{11}^{\hat{U}_m, \hat{V}_m} & \Sigma_{12}^{\hat{U}_m, \hat{V}_m} \\ \Sigma_{21}^{\hat{U}_m, \hat{V}_m} & \Sigma_{22}^{\hat{U}_m, \hat{V}_m} \end{pmatrix} \right), \quad (10)$$

where  $\Sigma_{11}^{\hat{U}_m, \hat{V}_m} = \sigma_U^2 + s_{U,m}^2$ ,  $\Sigma_{22}^{\hat{U}_m, \hat{V}_m} = \sigma_V^2 + s_{V,m}^2$ ,  $\Sigma_{12}^{\hat{U}_m, \hat{V}_m} = \Sigma_{21}^{\hat{U}_m, \hat{V}_m} = \rho_m^* \sqrt{(\sigma_U^2 + s_{U,m}^2)(\sigma_V^2 + s_{V,m}^2)}$ , and  $\rho_m^* = \rho \sqrt{\sigma_U^2 \sigma_V^2 / [(\sigma_U^2 + s_{U,m}^2)(\sigma_V^2 + s_{V,m}^2)]} < \rho$ . That is, the association between  $\hat{U}_m$  and  $\hat{V}_m$  is weaker than that between  $U_m$  and  $V_m$ ; it is attenuated given the additional variability of  $(\hat{U}_m, \hat{V}_m)$  given  $(U_m, V_m)$ . The log-likelihood function for observed HIV and marker incidence  $(\hat{U}_m, \hat{V}_m)$  for external cohort  $m = 1, \dots, M$  is then given by

$$\begin{aligned} l_M = & -M \log(2\pi) - \frac{1}{2} \sum_{m=1}^M \log \{ (\sigma_U^2 + s_{U,m}^2)(\sigma_V^2 + s_{V,m}^2) - \rho^2 \sigma_U^2 \sigma_V^2 \} \\ & - \sum_{m=1}^M \frac{(\sigma_V^2 + s_{V,m}^2) (\hat{U}_m - \mu_U)^2 - 2\rho \sqrt{\sigma_U^2 \sigma_V^2} (\hat{U}_m - \mu_U) (\hat{V}_m - \mu_V) + (\sigma_U^2 + s_{U,m}^2) (\hat{V}_m - \mu_V)^2}{2 \{ (\sigma_U^2 + s_{U,m}^2)(\sigma_V^2 + s_{V,m}^2) - \rho^2 \sigma_U^2 \sigma_V^2 \}}. \end{aligned}$$

We consider an EM algorithm treating  $(U_m, V_m)$  as missing data. Specifically, in the M-step, the log-likelihood for  $(U_m, V_m)$  ( $m = 1, \dots, M$ ) is given by

$$\begin{aligned} l_M = & -M \log(2\pi\sigma_U\sigma_V\sqrt{1-\rho^2}) \\ & - \frac{1}{2(1-\rho^2)} \sum_{m=1}^M \left\{ \left( \frac{U_m - \mu_U}{\sigma_U} \right)^2 - 2\rho \left( \frac{U_m - \mu_U}{\sigma_U} \right) \left( \frac{V_m - \mu_V}{\sigma_V} \right) + \left( \frac{V_m - \mu_V}{\sigma_V} \right)^2 \right\}. \end{aligned}$$

At the  $j$ th iteration, the maximizer of  $(\mu_U, \mu_V, \sigma_U^2, \sigma_V^2, \rho)$  given  $(U_m, V_m)$  is given by

$$\begin{aligned} \hat{\mu}_U^{(j)} &= M^{-1} \sum_{m=1}^M U_m, \quad \hat{\mu}_V^{(j)} = M^{-1} \sum_{m=1}^M V_m, \\ \hat{\sigma}_U^{2,(j)} &= M^{-1} \sum_{m=1}^M (U_m - \hat{\mu}_U^{(j)})^2, \quad \hat{\sigma}_V^{2,(j)} = M^{-1} \sum_{m=1}^M (V_m - \hat{\mu}_V^{(j)})^2, \\ \hat{\rho}^{(j)} &= \frac{M^{-1} \sum_{m=1}^M (U_m - \hat{\mu}_U^{(j)})(V_m - \hat{\mu}_V^{(j)})}{\hat{\sigma}_U^{(j)} \hat{\sigma}_V^{(j)}}. \end{aligned}$$

In the E-step, we evaluate the conditional expectation of the terms  $(U_m, V_m, U_m^2, V_m^2, U_m V_m)$  given the observed data  $(\hat{U}_m, \hat{V}_m)$  and current parameter values  $(\hat{\mu}_U^{(j)}, \hat{\mu}_V^{(j)}, \hat{\sigma}_U^{2,(j)}, \hat{\sigma}_V^{2,(j)}, \hat{\rho}^{(j)})$ . Note that the joint distribution of  $(\hat{U}_m, \hat{V}_m, U_m, V_m)^T$  is given by a multivariate normal, with mean  $(\mu_U, \mu_V, \mu_U, \mu_V)^T$  and the covariance matrix is given by

$$\begin{pmatrix} \sigma_U^2 & \rho\sigma_U\sigma_V & \sigma_U^2 & \rho\sigma_U\sigma_V \\ \rho\sigma_U\sigma_V & \sigma_V^2 & \rho\sigma_U\sigma_V & \sigma_V^2 \\ \sigma_U^2 & \rho\sigma_U\sigma_V & \sigma_U^2 + s_{U,m}^2 & \rho\sigma_U\sigma_V \\ \rho\sigma_U\sigma_V & \sigma_V^2 & \rho\sigma_U\sigma_V & \sigma_V^2 + s_{V,m}^2 \end{pmatrix}.$$

Then, the conditional distribution of  $(U_m, V_m)^T$  given  $(\hat{U}_m, \hat{V}_m)^T$  is bivariate normal, with mean

$$\begin{pmatrix} \tilde{\mu}_{U,m} \\ \tilde{\mu}_{V,m} \end{pmatrix} = \begin{pmatrix} \mu_U \\ \mu_V \end{pmatrix} + AB_m^{-1} \begin{pmatrix} \hat{U}_m - \mu_U \\ \hat{V}_m - \mu_V \end{pmatrix}$$

and variance matrix

$$\begin{pmatrix} \Sigma_{11} & \Sigma_{12} \\ \Sigma_{12} & \Sigma_{22} \end{pmatrix} = A - AB_m^{-1}A,$$

where

$$A = \begin{pmatrix} \sigma_U^2 & \rho\sigma_U\sigma_V \\ \rho\sigma_U\sigma_V & \sigma_V^2 \end{pmatrix}, \quad B_m = \begin{pmatrix} \sigma_U^2 + s_{U,m}^2 & \rho\sigma_U\sigma_V \\ \rho\sigma_U\sigma_V & \sigma_V^2 + s_{V,m}^2 \end{pmatrix}.$$

Based on the proceeding derivations, for each step of the EM algorithm, we updated  $(\mu_U, \mu_V, \sigma_U^2, \sigma_V^2, \rho)$  by

$$\begin{aligned}\hat{\mu}_U^{(j)} &= M^{-1} \sum_{m=1}^M \tilde{\mu}_{U,m}, & \hat{\mu}_V^{(j)} &= M^{-1} \sum_{m=1}^M \tilde{\mu}_{V,m} \\ \hat{\sigma}_U^{2,(j)} &= M^{-1} \sum_{m=1}^M (\tilde{\mu}_{U,m}^2 + \Sigma_{11} - 2 * \hat{\mu}_U^{(j)} \tilde{\mu}_{U,m} + (\hat{\mu}_U^{(j)})^2), \\ \hat{\sigma}_V^{2,(j)} &= M^{-1} \sum_{m=1}^M (\tilde{\mu}_{V,m}^2 + \Sigma_{22} - 2 * \hat{\mu}_V^{(j)} \tilde{\mu}_{V,m} + (\hat{\mu}_V^{(j)})^2), \\ \hat{\rho}^{(j)} &= \frac{M^{-1} \sum_{m=1}^M \tilde{\mu}_{U,m} \tilde{\mu}_{V,m} + \Sigma_{12} - \hat{\mu}_U^{(j)} \tilde{\mu}_{U,m} - \hat{\mu}_V^{(j)} \tilde{\mu}_{U,m} + \hat{\mu}_U^{(j)} \hat{\mu}_V^{(j)}}{\hat{\sigma}_U^{(j)} \hat{\sigma}_V^{(j)}},\end{aligned}$$

where  $\tilde{\mu}_{U,m}, \tilde{\mu}_{V,m}, \Sigma_{11}, \Sigma_{12}$ , and  $\Sigma_{22}$  are evaluated at the parameter value at the last step  $(\hat{\mu}_U^{(j-1)}, \hat{\mu}_V^{(j-1)}, \hat{\sigma}_U^{2,(j-1)}, \hat{\sigma}_V^{2,(j-1)}, \hat{\rho}^{(j-1)})$ . We iterate between the E-step and M-step till the algorithm converges.

Let  $\hat{\Sigma}$  be the estimated covariance matrix of  $(\hat{\mu}_U, \hat{\mu}_V, \hat{\sigma}_U^2, \hat{\sigma}_V^2, \hat{\rho})$  based on the maximum likelihood approach. By the delta method, the variance of  $\hat{U}_{0,k}$  can be estimated by

$$\widehat{var}(\hat{U}_{0,k}) = c_1 \begin{pmatrix} \hat{\Sigma} & 0 \\ 0 & \hat{s}_{V,k}^2 \end{pmatrix} c_1^T,$$

where

$$c_1 = \left( 1, -\frac{\hat{\rho} \hat{\sigma}_U \hat{\sigma}_V}{\hat{\sigma}_V^2 + \hat{s}_{V,k}^2}, \frac{\hat{\rho} \hat{\sigma}_V}{2 \hat{\sigma}_U (\hat{\sigma}_V^2 + \hat{s}_{V,k}^2)} (\hat{V}_k - \hat{\mu}_V), \frac{\hat{\rho} \hat{\sigma}_U (\hat{s}_{V,k}^2 - \hat{\sigma}_V^2)}{2 \hat{\sigma}_V (\hat{\sigma}_V^2 + \hat{s}_{V,k}^2)^2} (\hat{V}_k - \hat{\mu}_V), \frac{\hat{\rho} \hat{\sigma}_U \hat{\sigma}_V}{\hat{\sigma}_V^2 + \hat{s}_{V,k}^2} \right),$$

such that the variance of  $\hat{\lambda}_{0,k}^Y$  can be estimated by

$$\widehat{var}(\hat{\lambda}_{0,k}^Y) = \{\hat{\lambda}_{0,k}^Y\}^2 \widehat{var}(\hat{U}_{0,k})$$

with log-link, or

$$\widehat{var}(\hat{\lambda}_{0,k}^Y) = \{\hat{\lambda}_{0,k}^Y (1 - \hat{\lambda}_{0,k}^Y)\}^2 \widehat{var}(\hat{U}_{0,k})$$

with logit-link.

By applying the delta method again. Then, the variance of  $\log(\hat{\lambda}_k^Y / \hat{\lambda}_{0,k}^Y) = \hat{U}_k - \hat{U}_{0,k}$  can be estimated by

$$\frac{1 - \hat{\lambda}_k^Y}{n_{event,k}} + \widehat{var}(\hat{U}_{0,k}),$$

with log-link, and the variance of  $\widehat{PE}_k$  can be estimated by

$$\left( -\frac{1}{\hat{\lambda}_{0,k}^Y} \right)^2 \widehat{var}(\hat{\lambda}_k^Y) + \left( \frac{\hat{\lambda}_k^Y}{(\hat{\lambda}_{0,k}^Y)^2} \right)^2 \widehat{var}(\hat{\lambda}_{0,k}^Y) = \frac{1}{(\hat{\lambda}_{0,k}^Y)^2 n_{event,k}} + \frac{(1 - \hat{\lambda}_{0,k}^Y)^2 \widehat{var}(\hat{U}_{0,k})}{(\hat{\lambda}_{0,k}^Y)^2},$$

with logit-link, where  $n_{event,k}$  is the total number of events observed in the arm  $k$  in the trial.

### Working regression model

The conditional distribution of  $\hat{U}_m$  given  $\hat{V}_m$  is given by

$$\hat{U}_m = \alpha_m + \beta_m \hat{V}_m + \hat{\epsilon}_m, \quad (11)$$

where  $\alpha_m = \mu_U - \rho \frac{\sigma_U \sigma_Y}{\sigma_V^2 + s_{V,m}^2} \mu_V$ ,  $\beta_m = \rho \frac{\sigma_U \sigma_Y}{\sigma_V^2 + s_{V,m}^2}$ , and  $\hat{\epsilon}_m \sim N(0, (\sigma_U^2 + s_{U,m}^2)(1 - \rho_m^{*2}))$ . Note that the coefficients  $\alpha_m$  and  $\beta_m$  are cohort-specific. This suggests that naively fitting (7) may not produce an unbiased estimate of the regression function,  $f$ . Indeed, (7) is correctly specified if and only if  $s_{U,m}^2$  and  $s_{V,m}^2$  are the same for all  $m = 1, \dots, M$ .

The CI for  $\hat{\lambda}_{0,k}^{*,Y}$  is constructed based on a t-distribution approximation, given an asymptotic variance derived using the delta method. The analytical variance of  $\widehat{PE}_k^*$  is non-trivial, as it involves the ratio between asymptotically normally-distributed  $\hat{\lambda}_k^Y$  and approximately t-distributed  $\hat{\lambda}_{0,k}^{*,Y}$ , see e.g.<sup>46,47</sup> Therefore, to quantify uncertainty in  $\widehat{PE}_k^*$  we apply the bootstrap whereby  $M$  external cohorts are sampled with replacement. Specifically, in each bootstrap iteration, we randomly sample  $M$  external cohorts with replacement and fit the working regression model based on the sampled  $M$  external cohorts. We also sample individuals with replacement from the trial to construct an estimate of the exposure marker  $\hat{\lambda}_Z$  and  $\hat{\lambda}_Y$ . We then estimate the counterfactual placebo incidence and prevention efficacy by applying the bootstrapped incidence estimates to the bootstrapped working regression model.

## Additional simulation studies

### *Impact of violation of the conditional independence assumption*

We performed additional simulations in which the conditional independence assumption is violated. We assume the joint distribution of  $(\widehat{U}_m, \widehat{V}_m)$  conditional on  $(U_m, V_m)$  has the following form:

$$\begin{pmatrix} \widehat{U}_m \\ \widehat{V}_m \end{pmatrix} \middle| \begin{pmatrix} U_m \\ V_m \end{pmatrix} \sim MVN_2 \left( \begin{pmatrix} U_m \\ V_m \end{pmatrix}, \begin{bmatrix} s_{U,m}^2 & \rho_m \\ \rho_m & s_{V,m}^2 \end{bmatrix} \right), \quad (12)$$

where  $\rho_m$  measures the cohort-specific association between  $\widehat{U}_m$  and  $\widehat{V}_m$ . The external cohort estimates were generated from (12), with  $\rho_m$  randomly generated from  $U(0.4, 0.5)$ . We implemented likelihood-based and working model estimation methods that incorrectly assume conditional independence. As shown in Supplementary Tables S5 and S6, the performance of the counterfactual placebo incidence and PE estimates is similar to that under a conditional independence model, suggesting that the estimation is reasonably robust to violation of the conditional independence assumption. Similar robustness has been reported in related bivariate meta-analysis work.<sup>41</sup> One of the conditions that minimizes the impact of conditional dependence is small within-study variation relative to between-study variation, e.g. due to large external cohort sizes. This condition is largely satisfied under our simulation scenarios.

### *External cohorts: more cohorts of smaller sizes or fewer cohorts of larger sizes?*

In settings where external cohort data are available at a more granular level, e.g., when site-level data are available for multi-center studies, a question is whether performance of the counterfactual placebo estimate can be improved when the external cohort data are analyzed at the sub-cohort level. We conducted additional simulations for exploration. In these simulations, each of  $M = 20$  cohorts has  $L = 5$  sites and site-level HIV and HIV exposure marker incidences follow model (10). Person-years for each site is uniformly distributed as  $U(200/L, 5000/L) = U(40, 1000)$ . We compared results based on estimation of counterfactual placebo HIV incidence using cohort-level vs. site-level data, where the total sample size of the external cohort data is approximately constant. We found that analyzing data at the site level provides more precise inference, as reflected by narrower CIs with similar coverage rates (see Supplementary Table S7). Thus, given a fixed total sample size across external cohorts, more cohorts of smaller sizes is preferred to fewer cohorts of larger size.

## Supplementary Tables and Figures

**Table S1.** Estimated HIV and rectal gonorrhoea incidence rates for studies used as basis for simulations and analyzed in Mulick and Murray<sup>24</sup>

| Referenced Study               | HIV inc. cases/100 person-years | Num. person-years | RGC inc. cases/100 person-years | Num. person-years |
|--------------------------------|---------------------------------|-------------------|---------------------------------|-------------------|
| Morris et al. <sup>48</sup>    | 2.5                             | 943.2             | 3.5                             | 943.2             |
| Jin et al. <sup>49</sup>       | 0.9                             | 5160*             | 2.3                             | 5160*             |
| Molina et al. <sup>50</sup>    | 6.6                             | 212.1             | 15.5                            | 212.1             |
| Castillo et al. <sup>51</sup>  | 3.6                             | 1000*             | 10.1                            | 1000*             |
| Kelley et al. <sup>52</sup>    | 3.8                             | 843.1             | 6.2                             | 726.6             |
| McGowan et al. <sup>53</sup>   | 6.4                             | 50*               | 16.1                            | 50*               |
| McCormack et al. <sup>54</sup> | 9.0                             | 245               | 33.1                            | 596               |
| Girometti et al. <sup>55</sup> | 8.3                             | 100*              | 33.0                            | 100*              |

\*: person-years are approximate and not explicitly reported in the referenced studies.

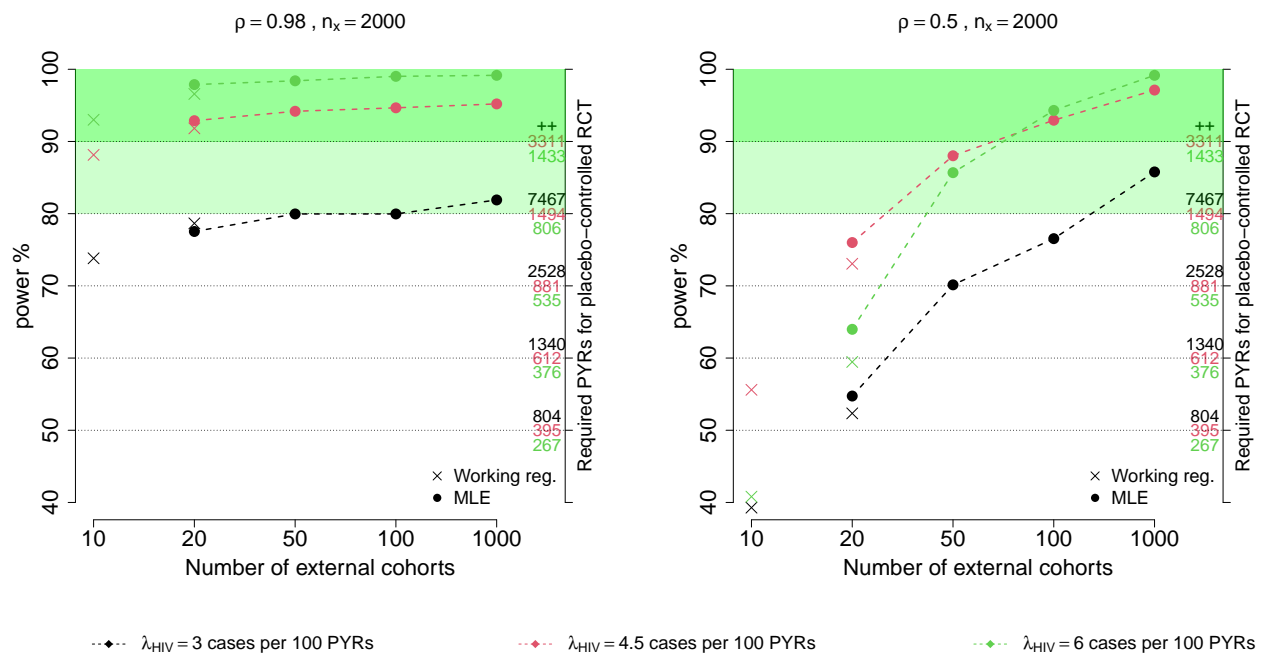

**Figure S1.** Power for testing  $H_0 : PE = 0.3$  vs.  $H_a : PE = 0.6$  using the counterfactual approach as a function of  $M$ , the number of external cohorts. Given a fixed active arm size of 2000 person-years, the power based on estimating counterfactual placebo HIV incidence with a highly correlated marker ( $\rho = 0.98$ ; left) or a moderately correlated exposure marker ( $\rho = 0.5$ ; right) are shown. The size (person-years) of a placebo arm required to obtain the power shown on the left hand y-axis is shown on the right-hand y-axis. Reflecting performance of the two estimation approaches, power is shown for the working model approach for  $M = 10, 20$  and for maximum likelihood (MLE) estimation with  $M = 20, 50, 100, 1000$ .

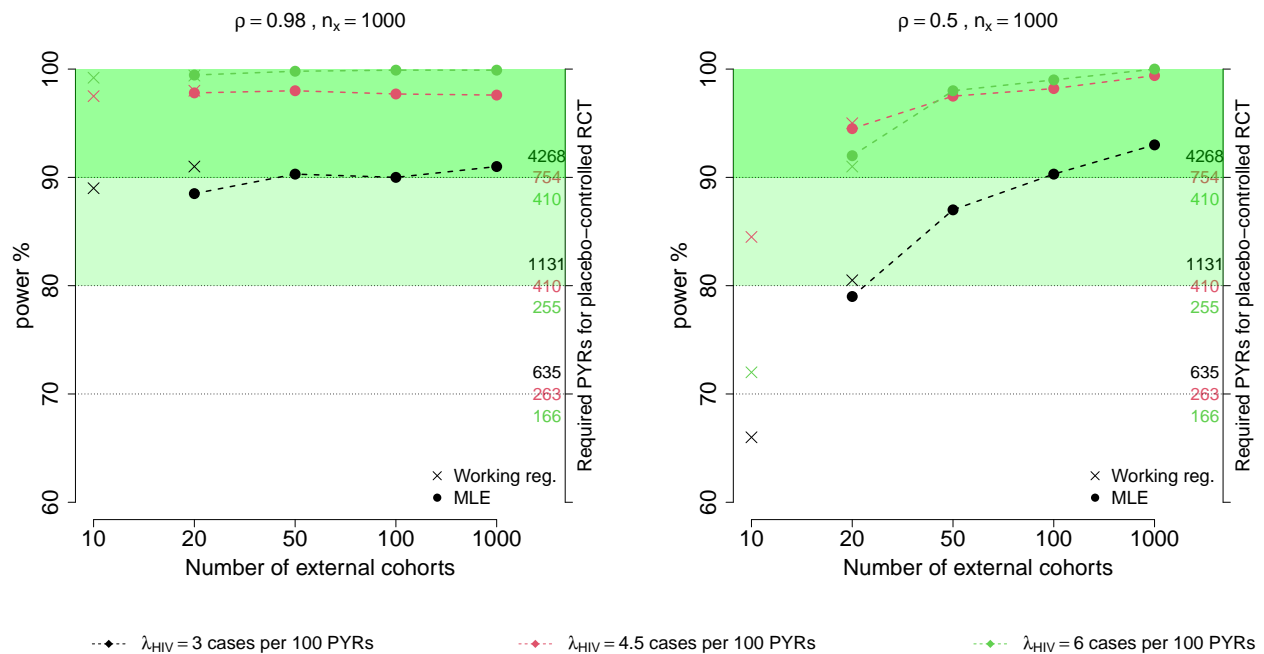

**Figure S2.** Power for testing  $H_0 : PE = 0.3$  vs.  $H_a : PE = 0.75$  using the counterfactual approach as a function of  $M$ , the number of external cohorts. Given a fixed active arm size of 1000 person-years, the power based on estimating counterfactual placebo HIV incidence with a highly correlated marker ( $\rho = 0.98$ ; left) or a moderately correlated exposure marker ( $\rho = 0.5$ ; right) are shown. The sizes (person-years) of a placebo arm, required to obtain the power shown on the left hand y-axis is shown on the right-hand y-axis. Reflecting performance of the two estimation approaches, power is shown for the working model approach for  $M = 10, 20$  and for maximum likelihood (MLE) estimation with  $M = 20, 50, 100, 1000$ .

**Table S2.** Bias, standard deviation, and empirical coverage for estimated counterfactual placebo HIV incidence, based on  $M$  external cohorts used to estimate the association between HIV and an exposure biomarker with correlation  $\rho$ . A total of  $n_x$  person-years follow-up accrue in the active arm of the trial. Counterfactual placebo HIV incidence varies. Performance is shown for working model and likelihood-based estimation approaches, assuming the logit link function for marginal incidences.

|                                                        |              |                                 | $\rho = 0.971$            |       |       | $\rho = 0.5$ |      |      |
|--------------------------------------------------------|--------------|---------------------------------|---------------------------|-------|-------|--------------|------|------|
| HIV incidence (cases per 100 person-years)             |              |                                 | 3                         | 4.5   | 6     | 3            | 4.5  | 6    |
| Exposure marker incidence (cases per 100 person-years) |              |                                 | 7.2                       | 12.3  | 17.6  | 4.8          | 13.5 | 26.2 |
|                                                        |              |                                 | Working model approach    |       |       |              |      |      |
| $M = 10$                                               | $n_x = 2000$ | Bias $\times 100$               | -0.01                     | -0.02 | -0.03 | 0.12         | 0.07 | 0.19 |
|                                                        |              | Standard deviation $\times 100$ | 0.35                      | 0.41  | 0.56  | 1.04         | 1.05 | 2.09 |
|                                                        |              | Coverage (%)                    | 95.7                      | 97.3  | 96.7  | 95.2         | 95.2 | 95.0 |
|                                                        | $n_x = 4000$ | Bias $\times 100$               | 0.00                      | -0.02 | -0.02 | 0.14         | 0.06 | 0.27 |
|                                                        |              | Standard deviation $\times 100$ | 0.33                      | 0.38  | 0.53  | 1.05         | 1.02 | 2.14 |
|                                                        |              | Coverage (%)                    | 94.9                      | 96.3  | 97.0  | 95.0         | 95.9 | 95.4 |
| $M = 20$                                               | $n_x = 2000$ | Bias $\times 100$               | -0.02                     | -0.03 | -0.03 | 0.05         | 0.01 | 0.06 |
|                                                        |              | Standard deviation $\times 100$ | 0.27                      | 0.32  | 0.41  | 0.65         | 0.70 | 1.28 |
|                                                        |              | Coverage (%)                    | 94.8                      | 96.2  | 97.0  | 95.6         | 95.4 | 95.4 |
|                                                        | $n_x = 4000$ | Bias $\times 100$               | -0.01                     | -0.03 | -0.04 | 0.05         | 0.02 | 0.07 |
|                                                        |              | Standard deviation $\times 100$ | 0.24                      | 0.28  | 0.37  | 0.65         | 0.71 | 1.34 |
|                                                        |              | Coverage (%)                    | 94.5                      | 95.7  | 97.1  | 94.9         | 94.6 | 94.9 |
|                                                        |              |                                 | Likelihood-based approach |       |       |              |      |      |
| $M = 20$                                               | $n_x = 2000$ | Bias $\times 100$               | 0.03                      | 0.02  | 0.02  | 0.11         | 0.09 | 0.16 |
|                                                        |              | Standard deviation $\times 100$ | 0.26                      | 0.31  | 0.41  | 0.66         | 0.71 | 1.33 |
|                                                        |              | Coverage (%)                    | 95.3                      | 95.2  | 94.8  | 93.9         | 93.9 | 93.8 |
|                                                        | $n_x = 4000$ | Bias $\times 100$               | 0.02                      | 0.03  | 0.03  | 0.11         | 0.09 | 0.14 |
|                                                        |              | Standard deviation $\times 100$ | 0.22                      | 0.28  | 0.36  | 0.65         | 0.69 | 1.31 |
|                                                        |              | Coverage (%)                    | 95.3                      | 94.2  | 94.6  | 94.1         | 93.8 | 94.3 |

**Table S3.** Bias, standard deviation, and empirical coverage for estimates of prevention efficacy (PE) based on  $M$  external cohorts used to estimate the association between HIV and an exposure biomarker with correlation  $\rho$ . A total of  $n_x = 2000$  person-years follow-up accrue in the active arm of the trial. Counterfactual placebo HIV incidence and true PE vary. Performance is shown for working model and likelihood-based estimation approaches, assuming logit link function for marginal incidences.

| $M$ PE estimate                                        |    |                                 | $\rho = 0.971$ |       |       | $\rho = 0.5$ |       |       |
|--------------------------------------------------------|----|---------------------------------|----------------|-------|-------|--------------|-------|-------|
| HIV incidence (cases per 100 person-years)             |    |                                 | 3              | 4.5   | 6     | 3            | 4.5   | 6     |
| Exposure marker incidence (cases per 100 person-years) |    |                                 | 7.2            | 12.3  | 17.6  | 4.8          | 13.5  | 26.2  |
| Working model approach                                 |    |                                 |                |       |       |              |       |       |
| $PE = 0.3$<br>$n_x = 2000$                             | 10 | Bias $\times 100$               | -1.08          | -0.62 | -0.85 | -4.62        | -2.56 | -5.41 |
|                                                        |    | Standard deviation $\times 100$ | 14.76          | 11.44 | 10.62 | 30.04        | 19.23 | 29.27 |
|                                                        |    | Coverage (%)                    | 92.8           | 93.3  | 93.2  | 91.7         | 92.2  | 90.2  |
|                                                        | 20 | Bias $\times 100$               | -0.88          | -0.75 | -0.67 | -1.84        | -1.38 | -2.10 |
|                                                        |    | Standard deviation $\times 100$ | 13.59          | 10.58 | 9.60  | 20.09        | 14.28 | 17.27 |
|                                                        |    | Coverage (%)                    | 92.8           | 93.3  | 93.0  | 93.0         | 93.8  | 93.1  |
| $PE = 0.6$<br>$n_x = 2000$                             | 10 | Bias $\times 100$               | -0.51          | -0.34 | -0.51 | -2.02        | -1.12 | -3.07 |
|                                                        |    | Standard deviation $\times 100$ | 9.83           | 7.86  | 7.38  | 17.88        | 11.83 | 17.19 |
|                                                        |    | Coverage (%)                    | 93.9           | 94.1  | 93.6  | 92.4         | 93.4  | 90.9  |
|                                                        | 20 | Bias $\times 100$               | -0.39          | -0.55 | -0.22 | -0.59        | -0.83 | -1.22 |
|                                                        |    | Standard deviation $\times 100$ | 9.45           | 7.59  | 6.67  | 12.64        | 9.44  | 11.01 |
|                                                        |    | Coverage (%)                    | 93.5           | 93.5  | 93.9  | 93.7         | 94.1  | 92.6  |
| $PE = 0.75$<br>$n_x = 2000$                            | 10 | Bias $\times 100$               | -0.21          | -0.21 | -0.22 | -1.10        | -0.53 | -1.76 |
|                                                        |    | Standard deviation $\times 100$ | 7.34           | 6.01  | 5.29  | 12.17        | 8.08  | 11.58 |
|                                                        |    | Coverage (%)                    | 93.9           | 93.8  | 94.5  | 92.9         | 93.2  | 92.2  |
|                                                        | 20 | Bias $\times 100$               | -0.14          | -0.13 | -0.19 | -0.16        | -0.37 | -0.73 |
|                                                        |    | Standard deviation $\times 100$ | 7.14           | 5.84  | 4.97  | 8.88         | 6.66  | 7.53  |
|                                                        |    | Coverage (%)                    | 93.3           | 94.0  | 94.2  | 93.7         | 94.2  | 93.3  |
| Likelihood-based approach                              |    |                                 |                |       |       |              |       |       |
| $PE = 0.3$<br>$n_x = 2000$                             | 20 | Bias $\times 100$               | -0.19          | -0.03 | -0.19 | -0.78        | -0.21 | -1.31 |
|                                                        |    | Standard deviation $\times 100$ | 12.48          | 9.97  | 8.77  | 18.78        | 13.95 | 17.34 |
|                                                        |    | Coverage (%)                    | 93.9           | 94.0  | 94.7  | 91.6         | 93.1  | 92.0  |
| $PE = 0.6$<br>$n_x = 2000$                             | 20 | Bias $\times 100$               | 0.07           | 0.02  | -0.01 | -0.42        | 0.03  | -0.54 |
|                                                        |    | Standard deviation $\times 100$ | 8.81           | 7.07  | 6.42  | 11.73        | 9.25  | 10.46 |
|                                                        |    | Coverage (%)                    | 94.0           | 94.4  | 93.5  | 92.1         | 92.5  | 92.3  |
| $PE = 0.75$<br>$n_x = 2000$                            | 20 | Bias $\times 100$               | 0.04           | 0.00  | 0.12  | -0.26        | -0.05 | -0.56 |
|                                                        |    | Standard deviation $\times 100$ | 6.79           | 5.50  | 4.83  | 8.33         | 6.52  | 7.20  |
|                                                        |    | Coverage (%)                    | 93.3           | 93.8  | 94.2  | 91.8         | 92.6  | 93.2  |

**Table S4.** Bias, standard deviation, and empirical coverage for estimates of prevention efficacy (PE) based on  $M$  external cohorts used to estimate the association between HIV and an exposure biomarker with correlation  $\rho$ . A total of  $n_x = 1000$  person-years follow-up accrue in the active arm of the trial. Counterfactual placebo HIV incidence and true PE vary. Performance is shown for working model and likelihood-based estimation approaches, assuming log link function for marginal incidences.

| $M$ PE estimate                                        |    |                                 | $\rho = 0.98$ |       |       | $\rho = 0.5$ |       |       |
|--------------------------------------------------------|----|---------------------------------|---------------|-------|-------|--------------|-------|-------|
| HIV incidence (cases per 100 person-years)             |    |                                 | 3             | 4.5   | 6     | 3            | 4.5   | 6     |
| Exposure marker incidence (cases per 100 person-years) |    |                                 | 7.1           | 11.8  | 17.0  | 4.8          | 13.2  | 26.7  |
| Working model approach                                 |    |                                 |               |       |       |              |       |       |
| $PE = 0.6$<br>$n_x = 1000$                             | 10 | Bias $\times 100$               | -0.66         | -0.72 | -0.54 | -2.28        | -0.58 | -2.18 |
|                                                        |    | Standard deviation $\times 100$ | 13.59         | 10.79 | 9.49  | 20.57        | 14.17 | 17.66 |
|                                                        |    | Coverage (%)                    | 93.1          | 93.8  | 93.7  | 93.6         | 93.1  | 92.4  |
|                                                        | 20 | Bias $\times 100$               | -0.68         | -0.61 | -0.36 | -1.13        | -0.36 | -0.86 |
|                                                        |    | Standard deviation $\times 100$ | 13.49         | 10.6  | 9.18  | 15.83        | 11.77 | 12.72 |
|                                                        |    | Coverage (%)                    | 93.0          | 93.4  | 93.5  | 93.9         | 93.9  | 93.3  |
| $PE = 0.75$<br>$n_x = 1000$                            | 10 | Bias $\times 100$               | -0.18         | -0.30 | -0.23 | -1.17        | -0.14 | -1.13 |
|                                                        |    | Standard deviation $\times 100$ | 10.24         | 8.18  | 7.18  | 14.31        | 10.07 | 11.84 |
|                                                        |    | Coverage (%)                    | 92.8          | 93.8  | 93.7  | 93.3         | 93.0  | 92.9  |
|                                                        | 20 | Bias $\times 100$               | -0.22         | -0.28 | -0.12 | -0.47        | -0.07 | -0.36 |
|                                                        |    | Standard deviation $\times 100$ | 10.25         | 8.12  | 7.02  | 11.52        | 8.75  | 8.95  |
|                                                        |    | Coverage (%)                    | 92.8          | 93.4  | 93.5  | 93.5         | 93.3  | 93.6  |
| Likelihood-based approach                              |    |                                 |               |       |       |              |       |       |
| $PE = 0.6$<br>$n_x = 1000$                             | 20 | Bias $\times 100$               | -0.10         | 0.01  | -0.05 | -0.11        | -0.45 | -0.63 |
|                                                        |    | Standard deviation $\times 100$ | 12.34         | 9.96  | 8.72  | 14.42        | 11.66 | 12.34 |
|                                                        |    | Coverage (%)                    | 95.7          | 95.4  | 94.9  | 95.2         | 94.4  | 93.8  |
| $PE = 0.75$<br>$n_x = 1000$                            | 20 | Bias $\times 100$               | -0.07         | 0.00  | -0.04 | -0.06        | -0.30 | -0.41 |
|                                                        |    | Standard deviation $\times 100$ | 9.56          | 7.75  | 6.77  | 10.61        | 8.69  | 8.76  |
|                                                        |    | Coverage (%)                    | 96.5          | 95.6  | 94.9  | 96.2         | 94.9  | 94.1  |



**Table S5.** Bias, standard deviation, and empirical coverage for estimated counterfactual placebo HIV incidence, based on  $M$  external cohorts used to estimate the association between HIV and an exposure biomarker with correlation  $\rho$ . A total of  $n_x$  person-years follow-up accrue in the active arm of the trial. Counterfactual placebo HIV incidence varies. Performance is shown for working model and likelihood-based approaches, assuming log link function for marginal incidences. The conditional correlation  $\rho_m$  are distributed uniformly in  $(0.4, 0.5)$ , while the estimation procedure assumes conditional independence.

|                                                        |                                 |                                 | $\rho = 0.98$             |      |      | $\rho = 0.5$ |      |      |
|--------------------------------------------------------|---------------------------------|---------------------------------|---------------------------|------|------|--------------|------|------|
| HIV incidence (cases per 100 person-years)             |                                 |                                 | 3                         | 4.5  | 6    | 3            | 4.5  | 6    |
| Exposure marker incidence (cases per 100 person-years) |                                 |                                 | 7.1                       | 11.8 | 17.0 | 4.8          | 13.2 | 26.7 |
|                                                        |                                 |                                 | Working model approach    |      |      |              |      |      |
| $M = 10$                                               | $n_x = 2000$                    | Bias $\times 100$               | 0.00                      | 0.01 | 0.03 | 0.11         | 0.12 | 0.37 |
|                                                        |                                 | Standard deviation $\times 100$ | 0.31                      | 0.37 | 0.50 | 1.01         | 1.07 | 2.19 |
|                                                        |                                 | Coverage (%)                    | 96.4                      | 97.1 | 97.1 | 95.4         | 95.2 | 95.5 |
| $n_x = 4000$                                           | Bias $\times 100$               | 0.00                            | 0.02                      | 0.04 | 0.16 | 0.08         | 0.37 |      |
|                                                        | Standard deviation $\times 100$ | 0.28                            | 0.34                      | 0.45 | 1.03 | 1.04         | 2.22 |      |
|                                                        | Coverage (%)                    | 95.5                            | 96.5                      | 96.8 | 95.3 | 95.3         | 95.1 |      |
| $M = 20$                                               | $n_x = 2000$                    | Bias $\times 100$               | 0.01                      | 0.01 | 0.02 | 0.06         | 0.04 | 0.16 |
|                                                        |                                 | Standard deviation $\times 100$ | 0.25                      | 0.30 | 0.37 | 0.64         | 0.71 | 1.35 |
|                                                        |                                 | Coverage (%)                    | 95.7                      | 96.3 | 96.6 | 94.3         | 95.8 | 95.1 |
| $n_x = 4000$                                           | Bias $\times 100$               | 0.00                            | 0.01                      | 0.02 | 0.05 | 0.06         | 0.19 |      |
|                                                        | Standard deviation $\times 100$ | 0.21                            | 0.25                      | 0.33 | 0.64 | 0.71         | 1.34 |      |
|                                                        | Coverage (%)                    | 95.1                            | 96.2                      | 96.8 | 94.7 | 94.9         | 95.2 |      |
|                                                        |                                 |                                 | Likelihood-based approach |      |      |              |      |      |
| $M = 20$                                               | $n_x = 2000$                    | Bias $\times 100$               | 0.03                      | 0.05 | 0.07 | 0.11         | 0.14 | 0.26 |
|                                                        |                                 | Standard deviation $\times 100$ | 0.25                      | 0.29 | 0.39 | 0.63         | 0.72 | 1.40 |
|                                                        |                                 | Coverage (%)                    | 95                        | 95.3 | 93.4 | 94.4         | 93.9 | 93.5 |
| $n_x = 4000$                                           | Bias $\times 100$               | 0.03                            | 0.04                      | 0.07 | 0.11 | 0.13         | 0.24 |      |
|                                                        | Standard deviation $\times 100$ | 0.21                            | 0.26                      | 0.36 | 0.65 | 0.69         | 1.39 |      |
|                                                        | Coverage (%)                    | 95.7                            | 94.7                      | 92.7 | 93.7 | 94.1         | 93.9 |      |

**Table S6.** Bias, standard deviation, and empirical coverage for estimates of prevention efficacy (PE) based on  $M$  external cohorts used to estimate the association between HIV and an exposure biomarker with correlation  $\rho$ . A total of  $n_x = 2000$  person-years follow-up accrue in the active arm of the trial. Counterfactual placebo HIV incidence and true PE vary. Performance is shown for working model and likelihood-based approaches, assuming log link function for marginal incidences. The conditional correlation  $\rho_m$  are distributed uniformly in  $(0.4, 0.5)$ , while the estimation procedure assumes conditional independence.

| $M$ PE estimate                                        |    |                                 | $\rho = 0.98$ |       |       | $\rho = 0.5$ |       |       |
|--------------------------------------------------------|----|---------------------------------|---------------|-------|-------|--------------|-------|-------|
| HIV incidence (cases per 100 person-years)             |    |                                 | 3             | 4.5   | 6     | 3            | 4.5   | 6     |
| Exposure marker incidence (cases per 100 person-years) |    |                                 | 7.1           | 11.8  | 17.0  | 4.8          | 13.2  | 26.7  |
| Working model approach                                 |    |                                 |               |       |       |              |       |       |
| $PE = 0.3$<br>$n_x = 2000$                             | 10 | Bias $\times 100$               | -0.74         | -0.45 | 0.10  | -4.04        | -1.51 | -2.96 |
|                                                        |    | Standard deviation $\times 100$ | 13.96         | 11.01 | 9.78  | 28.20        | 19.20 | 26.53 |
|                                                        |    | Coverage (%)                    | 92.7          | 93.3  | 93.4  | 91.0         | 91.9  | 91.1  |
|                                                        | 20 | Bias $\times 100$               | -0.65         | -0.18 | -0.12 | -1.64        | -0.64 | -1.14 |
|                                                        |    | Standard deviation $\times 100$ | 13.24         | 10.61 | 9.11  | 19.71        | 14.18 | 17.4  |
|                                                        |    | Coverage (%)                    | 92.9          | 92.9  | 93.5  | 92.9         | 94.1  | 92.6  |
| $PE = 0.6$<br>$n_x = 2000$                             | 10 | Bias $\times 100$               | -0.20         | -0.10 | -0.01 | -1.86        | -0.71 | -1.62 |
|                                                        |    | Standard deviation $\times 100$ | 9.73          | 7.80  | 6.87  | 17.32        | 12.14 | 15.83 |
|                                                        |    | Coverage (%)                    | 93.1          | 93.3  | 93.8  | 92.3         | 92.6  | 91.7  |
|                                                        | 20 | Bias $\times 100$               | -0.45         | 0.05  | -0.10 | -0.74        | -0.45 | -0.69 |
|                                                        |    | Standard deviation $\times 100$ | 9.39          | 7.55  | 6.53  | 12.47        | 9.24  | 10.64 |
|                                                        |    | Coverage (%)                    | 93.1          | 93.0  | 93.6  | 93.6         | 94.0  | 93.6  |
| $PE = 0.75$<br>$n_x = 2000$                            | 10 | Bias $\times 100$               | -0.03         | 0.06  | 0.04  | -0.99        | -0.29 | -0.93 |
|                                                        |    | Standard deviation $\times 100$ | 7.30          | 5.77  | 5.13  | 11.70        | 8.12  | 10.30 |
|                                                        |    | Coverage (%)                    | 93.1          | 93.7  | 93.8  | 92.5         | 93.9  | 92.7  |
|                                                        | 20 | Bias $\times 100$               | -0.19         | -0.08 | 0.20  | -0.32        | -0.08 | -0.21 |
|                                                        |    | Standard deviation $\times 100$ | 7.11          | 5.63  | 4.89  | 8.80         | 6.63  | 7.34  |
|                                                        |    | Coverage (%)                    | 93.0          | 94.0  | 93.5  | 93.7         | 93.9  | 93.4  |
| Likelihood-based approach                              |    |                                 |               |       |       |              |       |       |
| $PE = 0.3$<br>$n_x = 2000$                             | 20 | Bias $\times 100$               | 0.38          | 0.17  | 0.46  | -0.31        | 0.57  | -0.57 |
|                                                        |    | Standard deviation $\times 100$ | 12.27         | 9.83  | 8.82  | 18.44        | 13.71 | 17.69 |
|                                                        |    | Coverage (%)                    | 94.8          | 95.1  | 94.3  | 93.6         | 93.7  | 91.7  |
| $PE = 0.6$<br>$n_x = 2000$                             | 20 | Bias $\times 100$               | 0.22          | 0.11  | 0.27  | -0.23        | 0.15  | 0.14  |
|                                                        |    | Standard deviation $\times 100$ | 8.77          | 7.15  | 6.28  | 11.96        | 8.89  | 10.71 |
|                                                        |    | Coverage (%)                    | 95.3          | 95.2  | 94.7  | 94.2         | 94.8  | 92.6  |
| $PE = 0.75$<br>$n_x = 2000$                            | 20 | Bias $\times 100$               | 0.14          | -0.07 | 0.23  | -0.14        | 0.04  | -0.06 |
|                                                        |    | Standard deviation $\times 100$ | 6.77          | 5.51  | 4.77  | 8.49         | 6.54  | 7.25  |
|                                                        |    | Coverage (%)                    | 95.7          | 95.2  | 94.7  | 94.7         | 94.8  | 94.0  |

**Table S7.** A comparison of cohort-level vs. site-level inference. Bias, standard deviation, and empirical coverage for estimated counterfactual placebo HIV incidence and prevention efficacy, based on  $M = 20$  external cohorts used to estimate the association between HIV and an exposure biomarker with correlation  $\rho$ . A total of  $n_x = 2000$  person-years follow-up accrue in the active arm of the trial. Counterfactual placebo HIV incidence varies. Performance is shown for working model and likelihood-based approaches, assuming log link function for marginal incidences. Each of  $M = 20$  cohorts have  $L = 5$  sites and the inference is compared based on analysis of  $M = 20$  cohorts vs.  $M \times L = 100$  sites.

|                                                        |              |                                 | $\rho = 0.98$             |       |       | $\rho = 0.5$ |       |       |
|--------------------------------------------------------|--------------|---------------------------------|---------------------------|-------|-------|--------------|-------|-------|
| HIV incidence (cases per 100 person-years)             |              |                                 | 3                         | 4.5   | 6     | 3            | 4.5   | 6     |
| Exposure marker incidence (cases per 100 person-years) |              |                                 | 7.1                       | 11.8  | 17.0  | 4.8          | 13.2  | 26.7  |
| Est. counterfactual placebo HIV incidence              |              |                                 |                           |       |       |              |       |       |
|                                                        |              |                                 | Working model approach    |       |       |              |       |       |
| $M = 20$                                               | Cohort-level | Bias $\times 100$               | -0.01                     | -0.02 | -0.03 | 0.13         | 0.07  | 0.26  |
|                                                        |              | Standard deviation $\times 100$ | 0.33                      | 0.38  | 0.53  | 1.03         | 1.05  | 2.22  |
|                                                        |              | Coverage (%)                    | 96.1                      | 97.5  | 97.2  | 95.8         | 95.5  | 94.5  |
| $M \times L = 100$                                     | Site-level   | Bias $\times 100$               | -0.01                     | -0.09 | -0.18 | 0.02         | -0.08 | -0.19 |
|                                                        |              | Standard deviation $\times 100$ | 0.23                      | 0.26  | 0.3   | 0.31         | 0.34  | 0.60  |
|                                                        |              | Coverage (%)                    | 94.2                      | 94.3  | 94.3  | 94.4         | 94.6  | 93.6  |
|                                                        |              |                                 | Likelihood-based approach |       |       |              |       |       |
| $M = 20$                                               | Cohort-level | Bias $\times 100$               | -0.01                     | -0.02 | -0.02 | 0.11         | 0.09  | 0.25  |
|                                                        |              | Standard deviation $\times 100$ | 0.30                      | 0.36  | 0.49  | 1.00         | 1.09  | 2.12  |
|                                                        |              | Coverage (%)                    | 95.4                      | 96.5  | 96.8  | 95.4         | 95.4  | 95.7  |
| $M \times L = 100$                                     | Site-level   | Bias $\times 100$               | 0.04                      | 0.06  | 0.07  | 0.19         | 0.24  | 0.30  |
|                                                        |              | Standard deviation $\times 100$ | 0.24                      | 0.31  | 0.45  | 0.32         | 0.33  | 0.61  |
|                                                        |              | Coverage (%)                    | 93.0                      | 90.6  | 89.6  | 90.3         | 89.4  | 91.8  |
| Est. PE, PE=0.6                                        |              |                                 |                           |       |       |              |       |       |
|                                                        |              |                                 | Working model approach    |       |       |              |       |       |
| $M = 20$                                               | Cohort-level | Bias $\times 100$               | -0.46                     | -0.33 | -0.42 | -1.04        | -0.44 | -1.05 |
|                                                        |              | Standard deviation $\times 100$ | 9.49                      | 7.47  | 6.56  | 12.63        | 9.45  | 11.1  |
|                                                        |              | Coverage (%)                    | 93.3                      | 93.8  | 93.9  | 93.8         | 93.7  | 93.3  |
| $M \times L = 100$                                     | Site-level   | Bias $\times 100$               | -0.38                     | -1.04 | -1.28 | -0.09        | -0.82 | -1.59 |
|                                                        |              | Standard deviation $\times 100$ | 9.38                      | 7.59  | 6.52  | 9.42         | 7.72  | 7.38  |
|                                                        |              | Coverage (%)                    | 92.9                      | 93.5  | 93.8  | 94.2         | 94.0  | 93.9  |
|                                                        |              |                                 | Likelihood-based approach |       |       |              |       |       |
| $M = 20$                                               | Cohort-level | Bias $\times 100$               | -0.33                     | -0.21 | -0.22 | -1.14        | -0.62 | -1.19 |
|                                                        |              | Standard deviation $\times 100$ | 7.48                      | 5.95  | 5.29  | 11.8         | 8.30  | 10.38 |
|                                                        |              | Coverage (%)                    | 93.3                      | 93.9  | 93.6  | 93.0         | 92.9  | 91.9  |
| $M \times L = 100$                                     | Site-level   | Bias $\times 100$               | 0.35                      | 0.21  | 0.25  | 2.13         | 2.07  | 1.54  |
|                                                        |              | Standard deviation $\times 100$ | 8.68                      | 7.25  | 6.68  | 8.67         | 6.74  | 6.82  |
|                                                        |              | Coverage (%)                    | 95.3                      | 94.3  | 93.3  | 94.7         | 95.2  | 93.5  |

**JOURNAL CONTRIBUTOR'S PUBLISHING AGREEMENT**To be completed by the owner of copyright in the Contribution

\*\*Please use Adobe Reader or Adobe Acrobat to complete your agreement.\*\*

**Title of Article** : Estimating Counterfactual Placebo HIV Incidence in HIV Prevention Trials Without Placebo Arms Based on Markers of HIV Exposure

**Journal** : Clinical Trials

**All Author(s)** : Yifan Zhu; Fei Gao; David V Glidden; Deborah Donnell; Holly Janes

**Corresponding Author** : Fei Gao

**Corr. Author Address** : fgao@fredhutch.org

Please read the full terms and conditions on the following pages, then complete, sign and return all pages of this Agreement to the Journal's Editorial Office.

*The author who signs this Agreement certifies that he/she is authorised to sign on behalf of him/herself and in the case of a multi-authored Contribution, on behalf of all other authors of the Contribution. The authors understand that they each have the option of signing and returning a separate copy of this Agreement. This Agreement may be signed and executed by e-mail (a scanned hard copy of the Agreement with your signature on it or a digital original copy with your electronic signature are equally acceptable), by traditional hard copy or by fax.*

**EXCLUSIVE LICENCE TO PUBLISH**

In consideration for publication in the above Journal, you hereby grant to the owner(s) (the 'Proprietor') of the Journal identified above (the Journal title subject to verification by SAGE Publishing ('SAGE')) the **exclusive** right and licence to produce, publish and make available and to further sub-license your article ('Article') and the accompanying abstract (all materials collectively referenced as the 'Contribution') prepared by you for the full legal term of copyright and any renewals thereof throughout the world in all languages and in all formats, and through any medium of communication now known or later conceived or developed.

*If you or your funder wish your Contribution to be freely available online to non-subscribers immediately upon publication (gold open access), you can opt for it to be included in SAGE Choice, subject to payment of a publication fee. For further information, please visit [SAGE Choice](#).*

In the event you provide Supplemental Material to the Proprietor, you hereby grant to the Proprietor the **non-exclusive** right and licence to produce, publish and make available and to further sub-license the material, in whole or in part, for the full legal term of copyright and any renewals thereof throughout the world in all languages and in all formats, and through any medium of communication now known or later conceived or developed.

By signing this Contributor Agreement you agree both to the above provisions and to the Terms of the Agreement attached below.

Contributor Signature: \_\_\_\_\_

Date signed: 8/12/23

You represent that the Contribution is owned by you unless one of the following is checked:

- \*If any author is an employee of the United States Government and prepared the Contribution as part of their official duties, please check here:

US Government Agency Name: \_\_\_\_\_

- If any author prepared the Contribution at the direction of their employer, please have a representative of your employer sign below, and please check here:

Employer Name: \_\_\_\_\_

Authorized Signature: \_\_\_\_\_ Date signed: \_\_\_\_\_

**\*U.S. Government work.** If the Contribution was not prepared as part of the Contributor's official duties, it is not a U.S. Government work. If the Contribution was jointly authored, all the co-authors must have been U.S. Government employees at the time they prepared the Contribution in order for it to be a U.S. Government work; if any co-author was not a U.S. Government employee, then the Contribution is not a U.S. Government work. If the Contribution was prepared under a U.S. Government contract or grant, it is not a U.S. Government work - in such case, copyright is usually owned by the contractor or grantee.

*If you are required to submit an addendum by your employer or research funding body, please make your request via email to [contracts@sagepub.co.uk](mailto:contracts@sagepub.co.uk) indicating the name of the Journal and the title of your paper.*

Title: Estimating Counterfactual Placebo HIV Incidence in HIV Prevention Trials Without Placebo Arms Based on Markers of HIV Exposure

Manuscript ID: CT-22-0297.R4

Funding Information: **Health/National Institute of Allergy and Infectious Diseases (NIH/NIAID)** ✖  
 R01AI143357  
 R01CA152089  
 R56AI143418  
 UM1AI068635

Submitting Author:  Gao, Fei (proxy)

Authors & Institutions:

- primary affiliation*
  - Fred Hutchinson Cancer Center  
1100 Fairview Ave N Seattle Washington 98109  
United States
- [Zhu, Yifan](#)  
proxy
  - Fred Hutchinson Cancer Center  
Seattle, Washington  
United States
- [Gao, Fei](#)  
proxy  
<https://orcid.org/0000-0001-6797-5468> ✓
  - Fred Hutchinson Cancer Center  
Seattle, Washington  
United States
- [Glidden, David V.](#)  
proxy
  - University of California, San Francisco - Epidemiology and Biostatistics  
550 16th Street , San Francisco, California 94158  
United States
- [Donnell, Deborah](#)  
proxy
  - Fred Hutchinson Cancer Center  
Seattle, Washington  
United States
- [Janes, Holly](#)  
proxy
  - Fred Hutchinson Cancer Research Center ✓  
Seattle, Washington  
United States

Contact Author (populates the ##PROLE\_AU):  Save Current Contact

THOR\_..## e-mail tags):

Author:  
Gao,  
Fei  
([prox](#)  
[y](#))

Running Head: Estimating Counterfactual Placebo HIV Incidence

Keywords: counterfactual placebo \*, HIV prevention \*, randomized controlled trial \*, rectal gonorrhoea \*, trial design
